# Supplementary material for: Rapid synthesis of sea urchin-like Ni(OH)2@Ni(Fe)OOH electrocatalysts for the oxygen evolution reaction
Source: Royal Society of Chemistry journal article supplement (doi:10.1039/d4nj03135k), 2024-01-01
Supplement: d4nj03135k1.pdf [file d4nj03135k1.pdf]

## Supporting Information

### **Rapid synthesis of sea urchin-like $\text{Ni(OH)}_2@ \text{Ni(Fe)OOH}$ electrocatalysts for the oxygen evolution reaction**

Fang Wu,<sup>\*a,b</sup> Yuhong Jiao,<sup>a,b</sup> Jin-Long Ge,<sup>a,b</sup> Yujun Zhu,<sup>\*c</sup> Chao Feng,<sup>a,b</sup> Zhong Wu,<sup>a,b</sup> and Changpeng Lv<sup>a,b</sup>

<sup>a</sup>School of Materials and Chemical Engineering, Bengbu University, Bengbu, Anhui 233030, China. E-mail: bbcwuf@163.com

<sup>b</sup>Silicon Based New Materials Engineering Research Center of Anhui Province, Bengbu University, Bengbu, Anhui 233030, China.

<sup>c</sup>Department of Pharmacy and Biomedical Engineering, Anhui Medical University, Hefei 230000, China. E-mail: zyj8119@sina.com

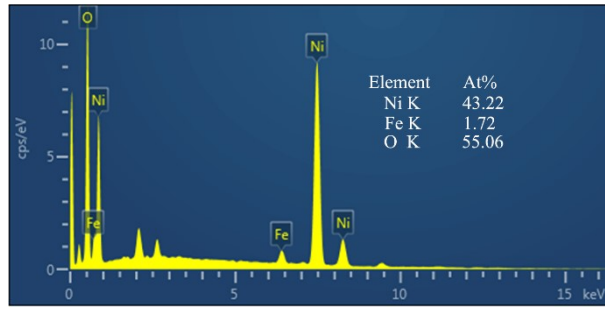

**Fig. S1** SEM-EDX spectrum of Ni(OH)<sub>2</sub>@Ni(Fe)OOH-100.

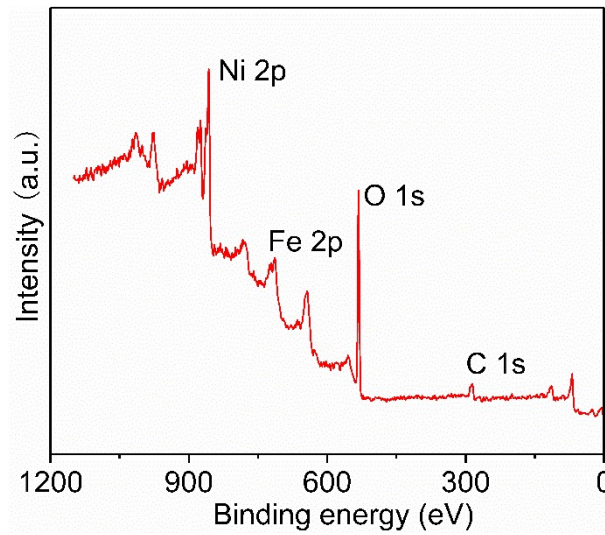

**Fig. S2** XPS survey spectrum of Ni(OH)<sub>2</sub>@Ni(Fe)OOH-100.

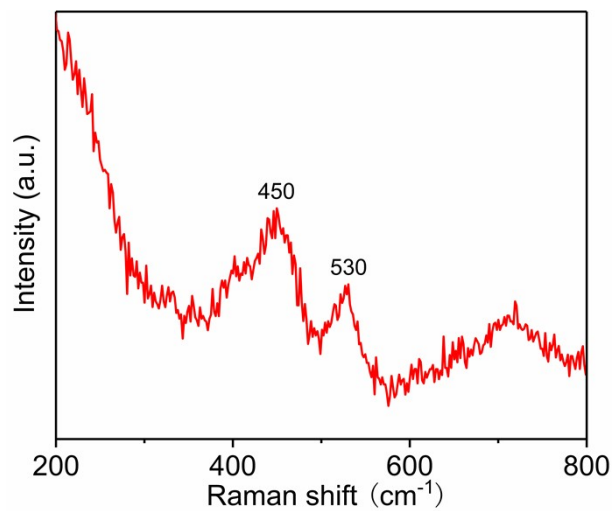

**Fig. S3** Raman spectrum of Ni(OH)<sub>2</sub>@Ni(Fe)OOH-100.

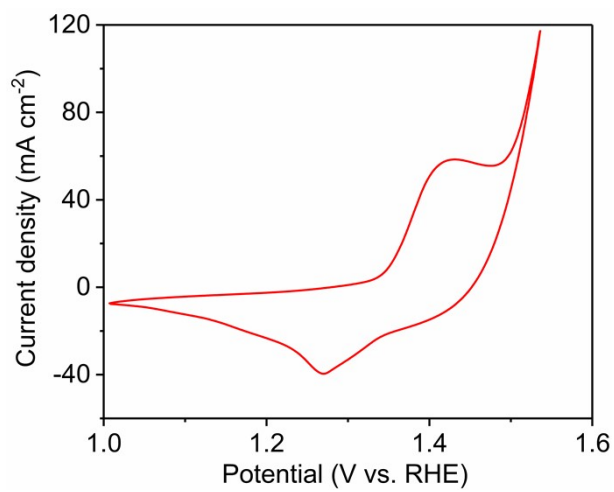

**Fig. S4** The cycling voltammetry curve (the 20<sup>th</sup> cycle) of Ni(OH)<sub>2</sub>@Ni(Fe)OOH-100 in 1 M KOH at the scan rate of 5 mV s<sup>-1</sup> after iR-correction.

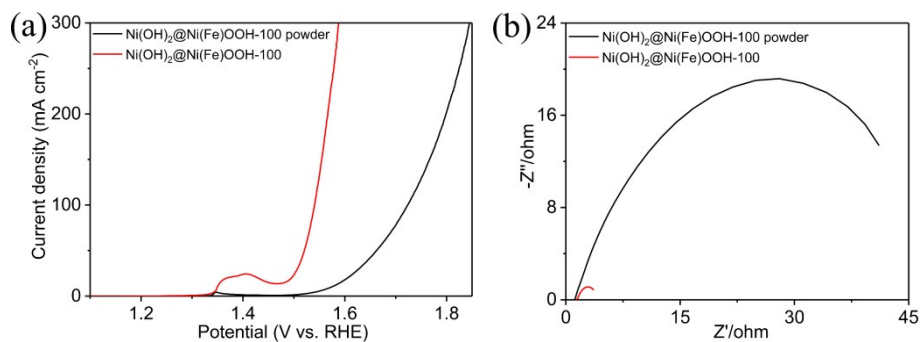

**Fig. S5** (a) Polarization curves and (b) EIS spectra of  $\text{Ni(OH)}_2@Ni(Fe)OOH-100$  and  $\text{Ni(OH)}_2@Ni(Fe)OOH-100$  powder.

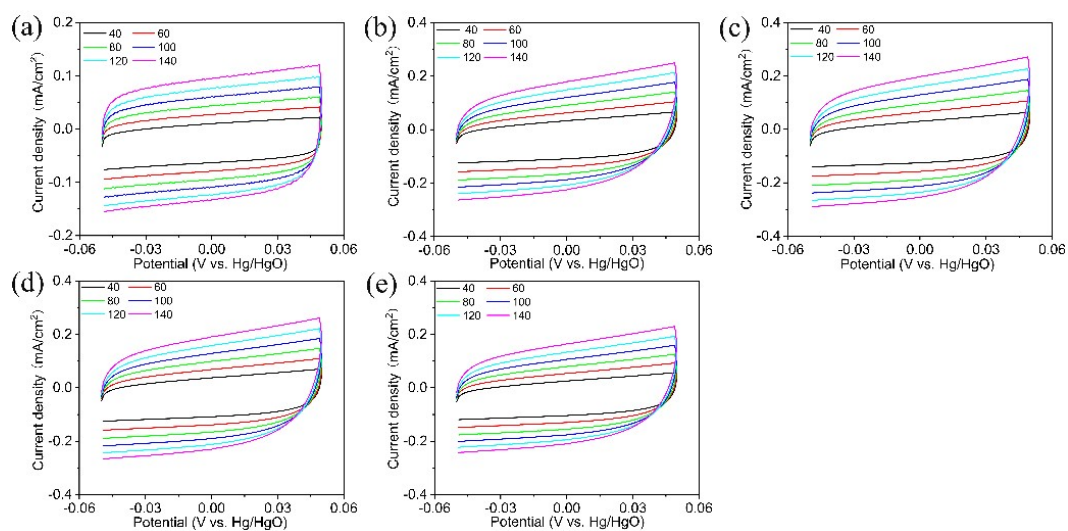

**Fig. S6** The CV curves of (a)  $\text{Ni(OH)}_2$ , (b)  $\text{Ni(OH)}_2@Ni(Fe)OOH-25$ , (c)  $\text{Ni(OH)}_2@Ni(Fe)OOH-50$ , (d)  $\text{Ni(OH)}_2@Ni(Fe)OOH-75$  and (e)  $\text{Ni(OH)}_2@Ni(Fe)OOH-100$  with different scan rates to evaluate the ECSA for OER process.

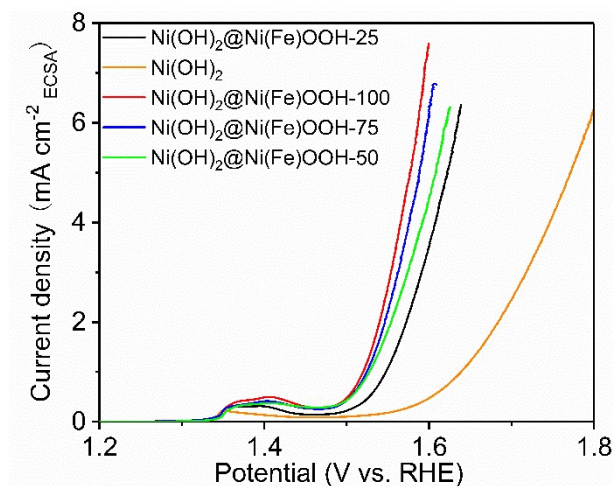

**Fig. S7** ECSA-normalized polarization curves for Ni(OH)<sub>2</sub>, (b) Ni(OH)<sub>2</sub>@Ni(Fe)OOH-25, (c) Ni(OH)<sub>2</sub>@Ni(Fe)OOH-50, (d) Ni(OH)<sub>2</sub>@Ni(Fe)OOH-75 and (e) Ni(OH)<sub>2</sub>@Ni(Fe)OOH-100.

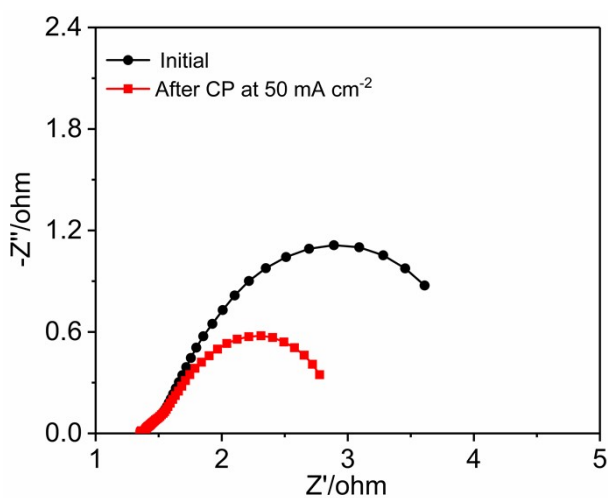

**Fig. S8** EIS spectra of Ni(OH)<sub>2</sub>@Ni(Fe)OOH-100 before and after stability test for 15 h.

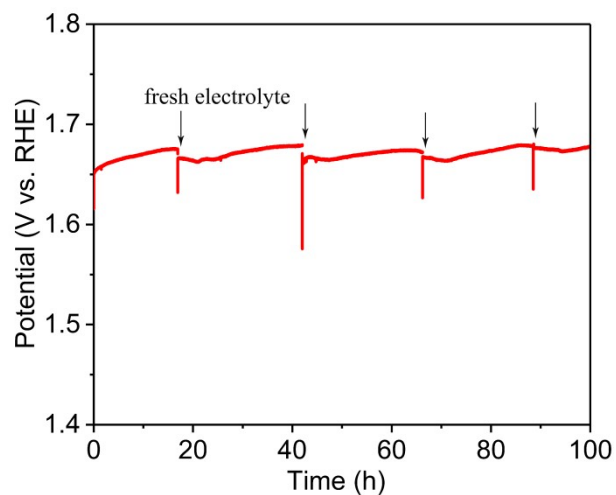

**Fig. S9** Stability test of Ni(OH)<sub>2</sub>@Ni(Fe)OOH-100 at 100 mA cm<sup>-2</sup> for 100 hours.

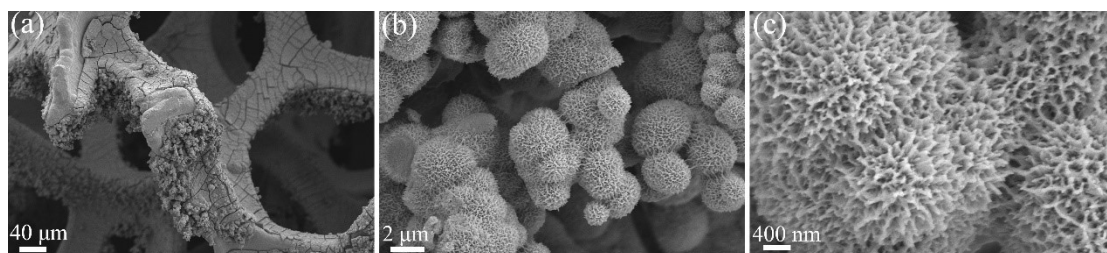

**Fig. S10** SEM images of Ni(OH)<sub>2</sub>@Ni(Fe)OOH-100 after stability test for 15 h.

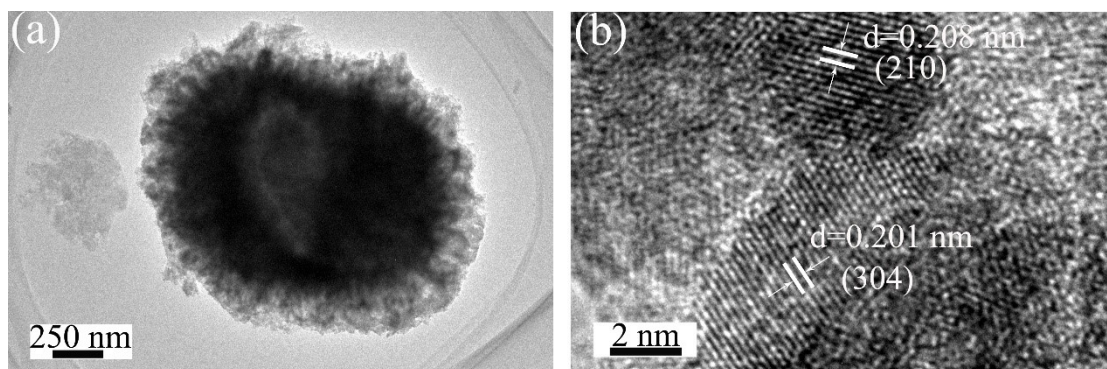

**Fig. S11** (a) TEM and (b) HRTEM images of Ni(OH)<sub>2</sub>@Ni(Fe)OOH-100 after stability test for 15 h.

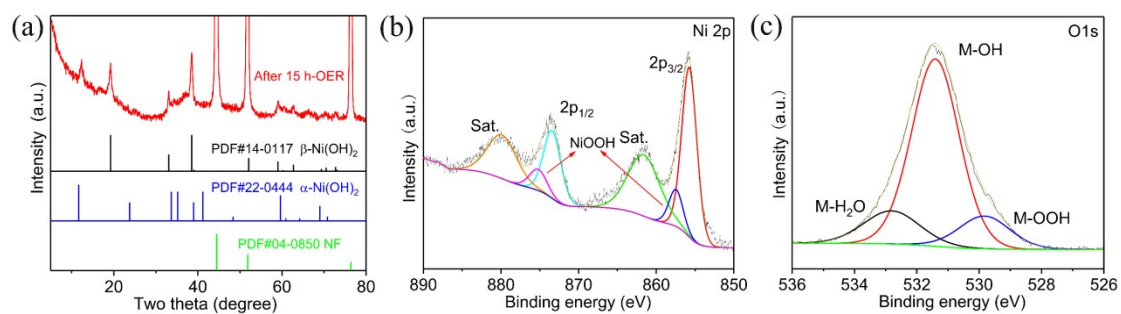

**Fig. S12** (a) XRD pattern of  $\text{Ni(OH)}_2@ \text{Ni(Fe)OOH-100}$  after stability test. High-resolution XPS spectra of (b) Ni 2p and (c) O 1s of  $\text{Ni(OH)}_2@ \text{Ni(Fe)OOH-100}$  after stability test for 15 h.

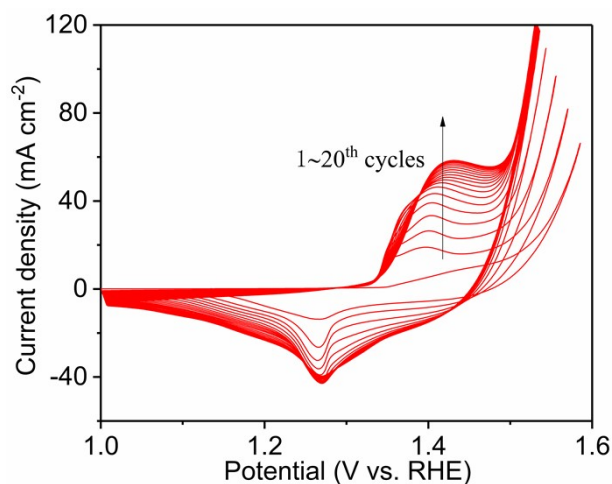

**Fig. S13** 20 CV cycles in the potential range of 1.0–1.6 V versus RHE at the scan rate of  $5 \text{ mV s}^{-1}$  after iR-correction.

**Table S1.** Comparison of OER performance of Ni(OH)<sub>2</sub>@Ni(Fe)OOH-100 with some Ni or Fe-based electrocatalysts in 1 M KOH.

| Catalysts                                                                | $\eta@$<br>10 mA cm <sup>-2</sup><br>(mV) | $\eta@$<br>100 mA cm <sup>-2</sup><br>(mV) | Tafel slope<br>(mV dec <sup>-1</sup> ) | References |
|--------------------------------------------------------------------------|-------------------------------------------|--------------------------------------------|----------------------------------------|------------|
| Ni(OH) <sub>2</sub> @Ni(Fe)OOH-100                                       | 245                                       | 310                                        | 40.7                                   | This work  |
| Fe-doped-Ni(OH) <sub>2</sub> -40 min                                     | 248                                       |                                            | 61                                     | [1]        |
| Fe-NiTe-Ni <sub>12</sub> P <sub>5</sub>                                  |                                           | 340                                        | 66                                     | [2]        |
| NiFe-LDH                                                                 | 247                                       |                                            | 37                                     | [3]        |
| Ni <sub>18</sub> Fe <sub>12</sub> Al <sub>70</sub>                       | 255                                       | 345                                        | 37                                     | [4]        |
| CoFe <sub>2</sub> O <sub>4</sub>                                         | 287                                       |                                            | 43                                     | [5]        |
| Co <sub>2</sub> P-Ni <sub>3</sub> S <sub>2</sub> /NF                     |                                           | 331.7                                      | 31.6                                   | [6]        |
| CoNiLDH/FeOOH                                                            | 250                                       |                                            | 60                                     | [7]        |
| FeNi <sub>3</sub> @NCNT                                                  | 264                                       |                                            | 58.5                                   | [8]        |
| ZnFe <sub>2</sub> O <sub>4</sub> @Ni <sub>3</sub> S <sub>2</sub>         | 254                                       |                                            | 39.29                                  | [9]        |
| NiCo <sub>2</sub> O <sub>4</sub> @MoS <sub>2</sub> /TM                   | 313                                       | 380                                        | 66.8                                   | [10]       |
| NiO-Ni <sub>3</sub> Se <sub>4</sub> /MXene                               | 260                                       |                                            | 39.6                                   | [11]       |
| C-NiFe <sub>2</sub> O <sub>4</sub> @A-S-NiFe <sub>2</sub> O <sub>4</sub> | 275                                       |                                            | 76.1                                   | [12]       |



**Table S2.** The values of  $R_s$  and  $R_{ct}$  obtained from fitted plots using equivalent circuit.

| Samples                                           | <i>Solution resistance <math>R_s</math></i> | <i>Charge transfer resistance <math>R_{ct}</math></i> |
|---------------------------------------------------|---------------------------------------------|-------------------------------------------------------|
|                                                   | ( $\Omega$ )                                | ( $\Omega$ )                                          |
| Ni(OH) <sub>2</sub>                               | 1.41                                        | 7.29                                                  |
| Ni(OH) <sub>2</sub> @Ni(Fe)OOH-25                 | 1.47                                        | 7.37                                                  |
| Ni(OH) <sub>2</sub> @Ni(Fe)OOH-50                 | 1.45                                        | 4.24                                                  |
| Ni(OH) <sub>2</sub> @Ni(Fe)OOH-75                 | 1.45                                        | 3.83                                                  |
| Ni(OH) <sub>2</sub> @Ni(Fe)OOH-100                | 1.40                                        | 3.66                                                  |
| RuO <sub>2</sub>                                  | 1.31                                        | 17.88                                                 |
| Ni(OH) <sub>2</sub> @Ni(Fe)OOH-100<br>powder@NF   | 1.15                                        | 57.12                                                 |
| NF                                                | 1.52                                        | 382.1                                                 |
| Post-Ni(OH) <sub>2</sub> @Ni(Fe)OOH-100<br>(15 h) | 1.38                                        | 2.04                                                  |

**Table S3.** Comparison of overall water splitting performance with some reported electrocatalysts in 1 M KOH.

| Catalysts                                                                                                  | Voltage<br>@10 mA cm <sup>-2</sup> (V) | References |
|------------------------------------------------------------------------------------------------------------|----------------------------------------|------------|
| Ni(OH) <sub>2</sub> @Ni(Fe)OOH-100  Pt/C                                                                   | 1.54                                   | This work  |
| Co/CoO/NC/CC  Co/CoO/NC/CC                                                                                 | 1.66                                   | [13]       |
| Ni <sub>2</sub> P-Fe <sub>2</sub> P/NF  Ni <sub>2</sub> P-Fe <sub>2</sub> P/NF                             | 1.561                                  | [14]       |
| W <sub>2</sub> N/WC  W <sub>2</sub> N/WC                                                                   | 1.58                                   | [15]       |
| V-Co <sub>2</sub> P <sub>4</sub> O <sub>12</sub> /CC  V-Co <sub>2</sub> P <sub>4</sub> O <sub>12</sub> /CC | 1.60                                   | [16]       |
| Co <sub>3</sub> S <sub>4</sub> @NiFe-200/NF  Co <sub>3</sub> S <sub>4</sub> @NiFe-200/NF                   | 1.595                                  | [17]       |
| ZnCoS-NSCNT/NP  ZnCoS-NSCNT/NP                                                                             | 1.59                                   | [18]       |
| MoS <sub>2</sub> /NiFe-LDH  MoS <sub>2</sub> /NiFe-LDH                                                     | 1.61                                   | [19]       |
| Co <sub>2</sub> Mo <sub>3</sub> O <sub>8</sub> @NC-800/NF  Pt/C                                            | 1.67                                   | [20]       |
| RuO <sub>2</sub> /NF  Pt/C@NF                                                                              | 1.56                                   | [21]       |
| Mn-NiCo <sub>2</sub> S <sub>4</sub> /NF  Pt/C                                                              | 1.59                                   | [22]       |

### Supplementary references

- [S1] C.-F. Li, H.-B. Tang, J.-W. Zhao, G.-R. L, *J. Mater. Chem. A*, 2023, **11**, 5841-5850.
- [S2] Y.-J. Tang, Y. Zou, D. Zhu, *J. Mater. Chem. A*, 2022, **10**, 12438-12446.
- [S3] H. Koshikawa, H. Murase, T. Hayashi, K. Nakajima, H. Mashiko, S. Shiraishi, Y. Tsuji, *ACS Catal.*, 2020, **10**, 1886-1893.
- [S4] X. Liu, H. Lu, S. Zhu, Z. Cui, Z. Li, S. Wu, W. Xu, Y. Liang, G. Long, H. Jiang, *Angew. Chem. Int. Ed.*, 2023, **62**, e202300800.
- [S5] G. Lee, M. Jeong, H. R. Kim, M. Kwon, S. Baek, S. Oh, M. Lee, D. Lee, J. H. Joo, *ACS Appl. Mater. Interfaces*, 2022, **14**, 48598-48608.
- [S6] H. Li, X. Gao, G. Li, *Small*, 2023, **19**, 2304081.
- [S7] P. Zhao, S. Fu, Y. Luo, C. Peng, L. Cheng, Z. Jiao, *Small*, 2023, **19**, 2305241.
- [S8] D. Chen, Q. Sun, C. Han, Y. Guo, Q. Huang, W. A. Goddard, J. Qian, *J. Mater. Chem. A*, 2022, **10**, 16007-16015.
- [S9] H. Liu, J. Miao, Y. Wang, S. Chen, Y. Tang, D. Zhu, *Chem. Commun.*, 2024, **60**, 4443-4446.

- [S10] W. Bao, Y. Li, J. Zhang, T. Ai, C. Yang, L. Feng, *Int. J. Hydrogen Energy*, 2023, **48**, 12176-12184.
- [S11] L. Yan, J. Liang, D. Song, X. Li, H. Li, *Adv. Funct. Mater.*, 2024, **34**, 2308345.
- [S12] X. Li, M. Wang, J. Fu, F. Lu, Z. Li, G. Wang, *Small*, 2024, **20**, 2310040.
- [S13] K. Dai, N. Zhang, L. Zhang, L. Yin, Y. Zhao, B. Zhang, *Chem. Eng. J.*, 2021, **414**, 128804.
- [S14] L. Wu, L. Yu, F. Zhang, B. McElhenny, D. Luo, A. Karim, S. Chen, Z. Ren, *Adv. Funct. Mater.*, 2021, **31**, 2006484.
- [S15] J. Diao, Y. Qiu, S. Liu, W. Wang, K. Chen, H. Li, W. Yuan, Y. Qu, X. Guo, *Adv. Mater.*, 2020, **32**, 1905679.
- [S16] X.-W. Chang, S. Li, L. Wang, L. Dai, Y.-P. Wu, X.-Q. Wu, Y. Tian, S. Zhang, D.-S. Li, *Adv. Funct. Mater.*, 2024, **34**, 2313974.
- [S17] L. Chen, H. Chen, L. Wu, G. Li, K. Tao, L. Han, *ACS Appl. Mater. Interfaces*, 2024, **16**, 8751-8762.
- [S18] Z. Yu, Y. Bai, S. Zhang, Y. Liu, N. Zhang, K. Sun, *J. Mater. Chem. A*, 2018, **6**, 10441-10446.
- [S19] X.-P. Li, L.-R. Zheng, S.-J. Liu, T. Ouyang, S. Ye, Z.-Q. Liu, *Chinese Chem. Lett.*, 2022, **33**, 4761-4765.
- [S20] T. Ouyang, X.-T. Wang, X.-Q. Mai, A.-N. Chen, Z.-Y. Tang, Z.-Q. Liu, *Angew. Chem. Int. Ed.*, 2020, **59**, 11948-11957.
- [S21] H. Yan, Y. Xie, A. Wu, Z. Cai, L. Wang, C. Tian, X. Zhang, H. Fu, *Adv. Mater.*, 2019, **31**, 1901174.
- [S22] Y. Chen, H. Wu, N. Tang, Y. Zhang, Y. Wang, *Chem. Commun.*, 2024, **60**, 1751-1753.
